# Supplementary material for: Comparison of Change of Direction Speed Performance and Asymmetries between Team-Sport Athletes: Application of Change of Direction Deficit
Source: MDPI journal article supplement (doi:10.3390/sports6040174), 2018-12-12
Supplement: s1 [file s1]

Table S1 - Sex and sport descriptive data for 10-m sprint, 505 times, change of direction deficits, and asymmetries between sports

|                   | Pairwise comparisons | 10-m sprint (s) |       | COD deficit D (s) |       | COD deficit ND (s) |       | 505 D (s) |       | 505 ND (s) |       | COD deficit imbalance % |      | 505 imbalance % |     |
|-------------------|----------------------|-----------------|-------|-------------------|-------|--------------------|-------|-----------|-------|------------|-------|-------------------------|------|-----------------|-----|
|                   |                      | Mean            | SD    | Mean              | SD    | Mean               | SD    | Mean      | SD    | Mean       | SD    | Mean                    | SD   | Mean            | SD  |
| Sex comparison    | Male                 | 1.889           | 0.090 | 0.497             | 0.124 | 0.596              | 0.126 | 2.386     | 0.135 | 2.484      | 0.139 | -23.2                   | 22.4 | -4.2            | 3.2 |
|                   | Female               | 2.047           | 0.120 | 0.520             | 0.096 | 0.593              | 0.112 | 2.567     | 0.147 | 2.640      | 0.165 | -14.9                   | 13.3 | -2.8            | 2.4 |
| Sport comparisons | Cricket              | 1.971           | 0.129 | 0.524             | 0.116 | 0.612              | 0.098 | 2.495     | 0.188 | 2.584      | 0.160 | -20.4                   | 21.1 | -3.7            | 2.8 |
|                   | Court                | 1.917           | 0.088 | 0.533             | 0.103 | 0.608              | 0.125 | 2.450     | 0.101 | 2.525      | 0.125 | -15.3                   | 17.8 | -3.0            | 3.2 |
|                   | Soccer               | 2.032           | 0.157 | 0.458             | 0.099 | 0.552              | 0.131 | 2.490     | 0.198 | 2.584      | 0.225 | -21.2                   | 15.5 | -3.7            | 2.7 |

Key: D: Dominant; ND: Non-dominant; COD: Change of direction; F: Female; M: Male

Table S1 - Sex and sport pairwise comparisons in 10-m sprint, 505 times, change of direction deficits, and asymmetries between sports

|                   | Pairwise comparisons | 10-m sprint |          | COD deficit D |          | COD deficit ND |          | 505 D    |          | 505 ND   |          | COD deficit imbalance |          | 505 imbalance |          |
|-------------------|----------------------|-------------|----------|---------------|----------|----------------|----------|----------|----------|----------|----------|-----------------------|----------|---------------|----------|
|                   |                      | <i>p</i>    | <i>g</i> | <i>p</i>      | <i>g</i> | <i>p</i>       | <i>g</i> | <i>p</i> | <i>g</i> | <i>p</i> | <i>g</i> | <i>p</i>              | <i>g</i> | <i>p</i>      | <i>g</i> |
| Sex comparison    | Male vs Female       | <0.001      | -1.48    | 0.261         | -0.21    | 0.927          | 0.02     | <0.001   | -1.28    | <0.001   | -1.02    | 0.051                 | -0.45    | 0.026         | -0.465   |
| Sport comparisons | Cricket vs court     | 0.014       | 0.48     | 1.000         | -0.09    | 1.000          | 0.04     | 0.325    | 0.29     | 0.177    | 0.41     | .287                  | -0.26    | 0.325         | -0.21    |
|                   | Cricket vs soccer    | 0.012       | -0.42    | 0.027         | 0.60     | 0.078          | 0.52     | 1.000    | 0.02     | 1.000    | 0.00     | 1.00                  | 0.04     | 1.000         | 0.02     |
|                   | Court vs soccer      | <0.001      | -0.89    | 0.010         | 0.74     | 0.099          | 0.43     | 0.457    | -0.25    | 0.193    | -0.32    | .212                  | 0.35     | 0.457         | 0.23     |

Key: D: Dominant; ND: Non-dominant; COD: Change of direction; F: Female; M: Male

Table S1 - Pairwise comparisons between sexes of the same sport for 10-m sprint, 505 times, change of direction deficits, and asymmetries between sports

| Pairwise comparisons      | 10-m sprint |          | COD deficit D |          | COD deficit ND |          | 505 D    |          | 505 ND   |          | COD deficit imbalance |          | 505 imbalance |          |
|---------------------------|-------------|----------|---------------|----------|----------------|----------|----------|----------|----------|----------|-----------------------|----------|---------------|----------|
|                           | <i>p</i>    | <i>g</i> | <i>p</i>      | <i>g</i> | <i>p</i>       | <i>g</i> | <i>p</i> | <i>g</i> | <i>p</i> | <i>g</i> | <i>p</i>              | <i>g</i> | <i>p</i>      | <i>g</i> |
| F cricket vs M cricket    | <0.001      | 1.81     | 0.524         | 0.58     | 1.000          | 0.22     | <0.001   | 1.64     | <0.001   | 1.53     | 0.032                 | 0.80     | 0.030         | 0.84     |
| F netball vs M basketball | 0.005       | 1.62     | 1.000         | -0.44    | 0.220          | -0.75    | 1.000    | 0.67     | 1.000    | 0.17     | 0.234                 | 0.51     | 0.123         | 0.60     |
| F soccer vs M soccer      | <0.001      | 1.69     | 1.000         | 0.34     | 1.000          | 0.49     | <0.001   | 1.48     | <0.001   | 1.45     | 0.453                 | -0.35    | 0.635         | -0.31    |

Key: D: Dominant; ND: Non-dominant; COD: Change of direction; F: Female; M: Male

Table S1 - Pairwise comparisons in 10-m sprint, 505 times, change of direction deficits, and asymmetries between team-sports

| Pairwise comparisons      | 10-m sprint |          | COD deficit D |          | COD deficit ND |          | 505 D    |          | 505 ND   |          | COD deficit imbalance |          | 505 imbalance |          |
|---------------------------|-------------|----------|---------------|----------|----------------|----------|----------|----------|----------|----------|-----------------------|----------|---------------|----------|
|                           | <i>p</i>    | <i>g</i> | <i>p</i>      | <i>g</i> | <i>p</i>       | <i>g</i> | <i>p</i> | <i>g</i> | <i>p</i> | <i>g</i> | <i>p</i>              | <i>g</i> | <i>p</i>      | <i>g</i> |
| F cricket vs F netball    | 0.029       | 1.07     | 1.000         | 0.50     | 1.000          | 0.59     | 0.019    | 1.29     | 0.013    | 1.30     | 0.474                 | -0.14    | 0.296         | -0.21    |
| F cricket vs F soccer     | 0.177       | -0.64    | 0.338         | 0.79     | 1.000          | 0.29     | 1.000    | 0.00     | 1.000    | -0.23    | 0.041                 | 0.79     | 0.152         | 0.59     |
| F cricket vs M basketball | <0.001      | 2.30     | 1.000         | -0.02    | 1.000          | -0.28    | <0.001   | 1.64     | 0.005    | 1.17     | 0.485                 | 0.45     | 0.374         | 0.49     |
| F cricket vs M cricket    | <0.001      | 1.81     | 0.524         | 0.58     | 1.000          | 0.22     | <0.001   | 1.64     | <0.001   | 1.53     | 0.032                 | 0.80     | 0.030         | 0.84     |
| F cricket vs M soccer     | 0.001       | 1.30     | 0.015         | 1.23     | 0.093          | 0.98     | <0.001   | 2.04     | <0.001   | 1.73     | 0.116                 | 0.56     | 0.242         | 0.39     |
| F netball vs F soccer     | <0.001      | -1.53    | 1.000         | 0.38     | 1.000          | -0.15    | 0.059    | -0.88    | 0.002    | -1.09    | 0.017                 | 0.86     | 0.038         | 0.72     |
| F netball vs M basketball | 0.005       | 1.62     | 1.000         | -0.44    | 0.220          | -0.75    | 1.000    | 0.67     | 1.000    | 0.17     | 0.234                 | 0.51     | 0.123         | 0.60     |
| F netball vs M cricket    | 0.056       | 1.05     | 1.000         | 0.20     | 1.000          | -0.37    | 0.152    | 0.82     | 1.000    | 0.43     | 0.009                 | 0.85     | 0.005         | 0.96     |
| F netball vs M soccer     | 1.000       | 0.44     | 0.655         | 0.80     | 1.000          | 0.45     | 0.271    | 1.13     | 1.000    | 0.68     | 0.034                 | 0.65     | 0.061         | 0.56     |
| F soccer vs M basketball  | <0.001      | 2.46     | 0.425         | -0.70    | 1.000          | -0.48    | 0.001    | 1.21     | 0.001    | 1.08     | 0.265                 | -0.16    | 0.533         | -0.02    |
| F soccer vs M cricket     | <0.001      | 2.10     | 1.000         | -0.12    | 1.000          | -0.12    | <0.001   | 1.30     | <0.001   | 1.30     | 0.964                 | 0.19     | 0.502         | 0.19     |
| F soccer vs M soccer      | <0.001      | 1.69     | 1.000         | 0.34     | 1.000          | 0.49     | <0.001   | 1.48     | <0.001   | 1.45     | 0.453                 | -0.35    | 0.635         | -0.31    |
| M basketball vs M cricket | 1.000       | -0.35    | 0.674         | 0.53     | 1.000          | 0.45     | 1.000    | 0.27     | 1.000    | 0.19     | 0.234                 | 0.31     | 0.331         | 0.19     |
| M basketball vs M soccer  | 0.292       | -0.91    | 0.026         | 1.06     | 0.011          | 1.06     | 1.000    | 0.35     | 1.000    | 0.40     | 0.471                 | -0.11    | 0.829         | -0.25    |
| M cricket vs M soccer     | 1.000       | -0.52    | 1.000         | 0.43     | 0.455          | 0.78     | 1.000    | 0.01     | 1.000    | 0.24     | 0.424                 | -0.47    | 0.199         | -0.55    |

Key: D: Dominant; ND: Non-dominant; COD: Change of direction; F: Female; M: Male
