# Supplementary material for: Comparison of Change of Direction Speed Performance and Asymmetries between Team-Sport Athletes: Application of Change of Direction Deficit
Source: MDPI journal article supplement (doi:10.3390/sports6040174), 2018-12-12

**Figure S1. Spearman's correlations between 505 time, COD deficit, and 10-m sprint time for D and ND directions (pooled data, n =115)**

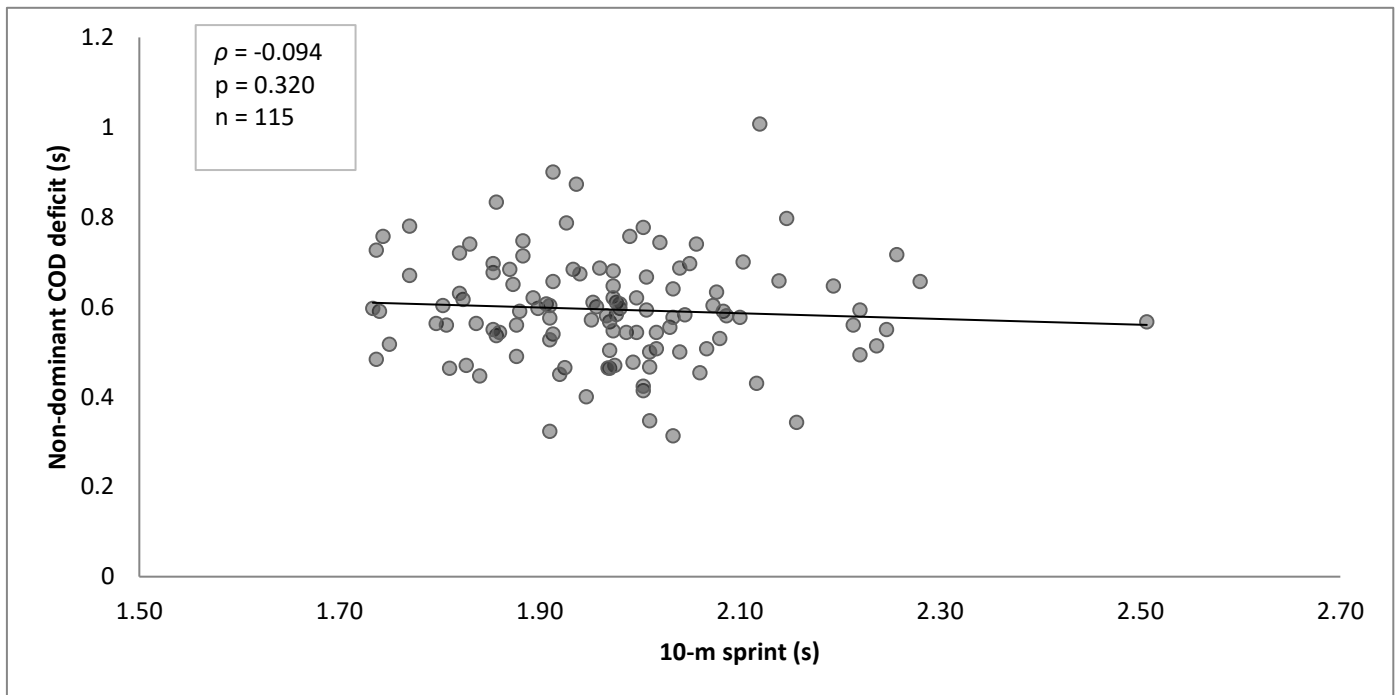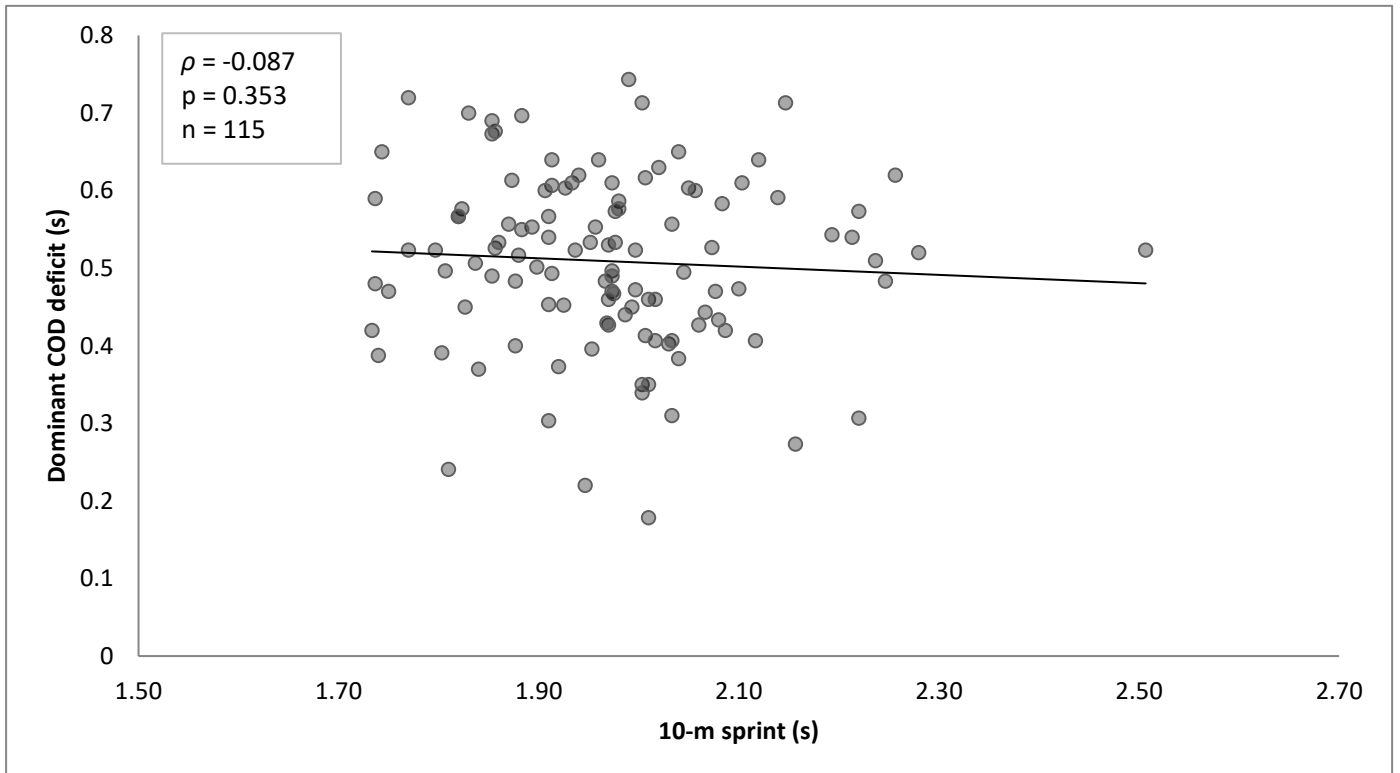

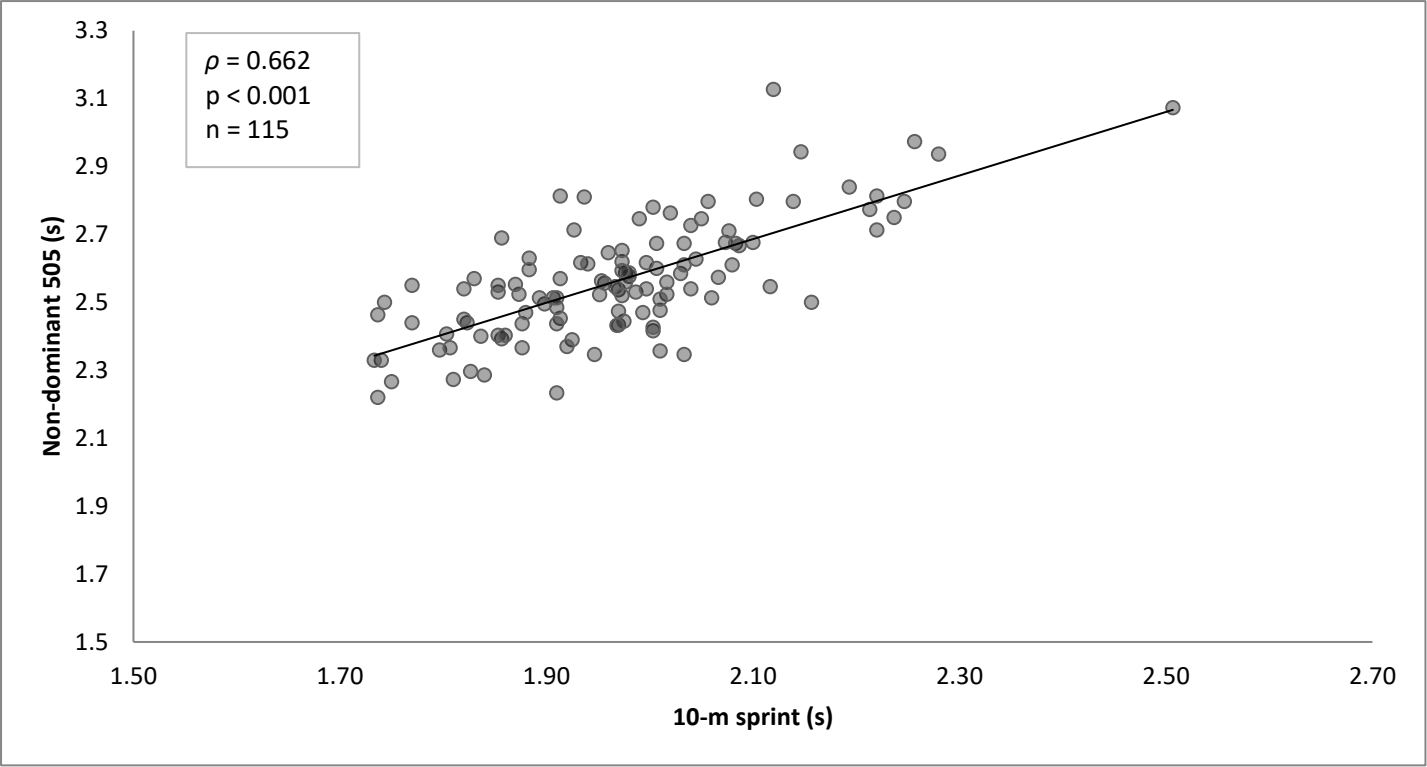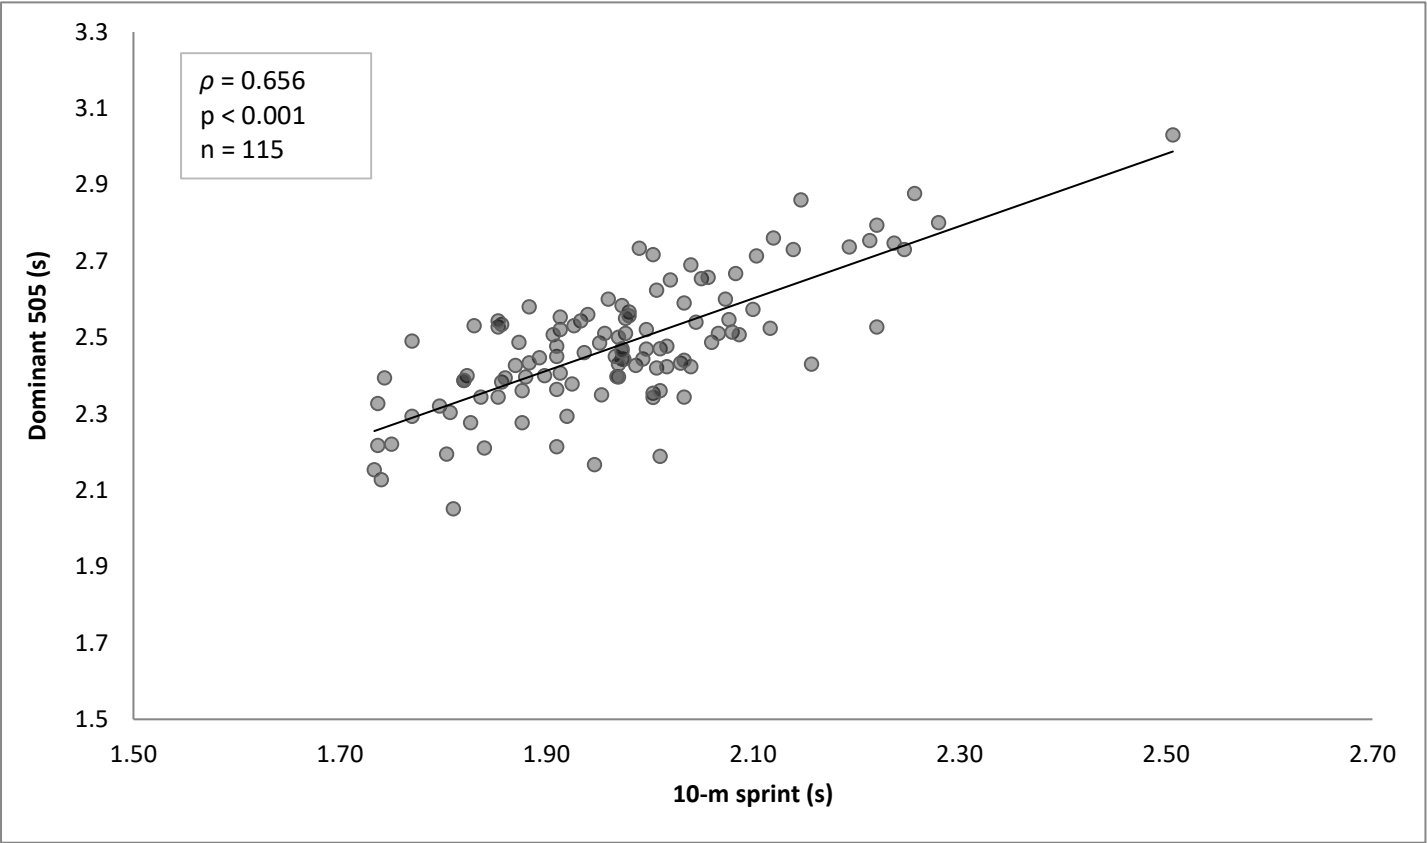

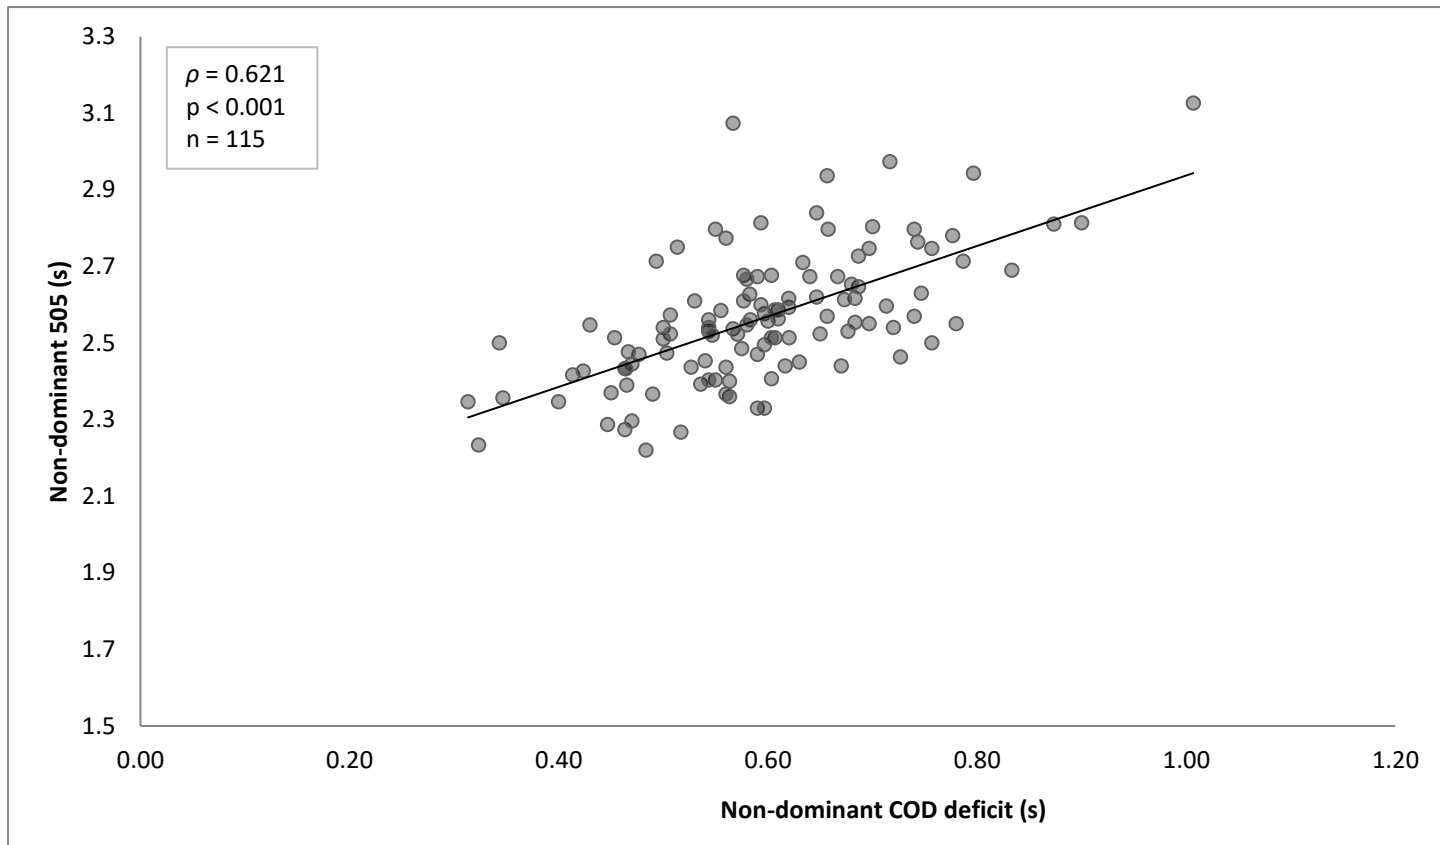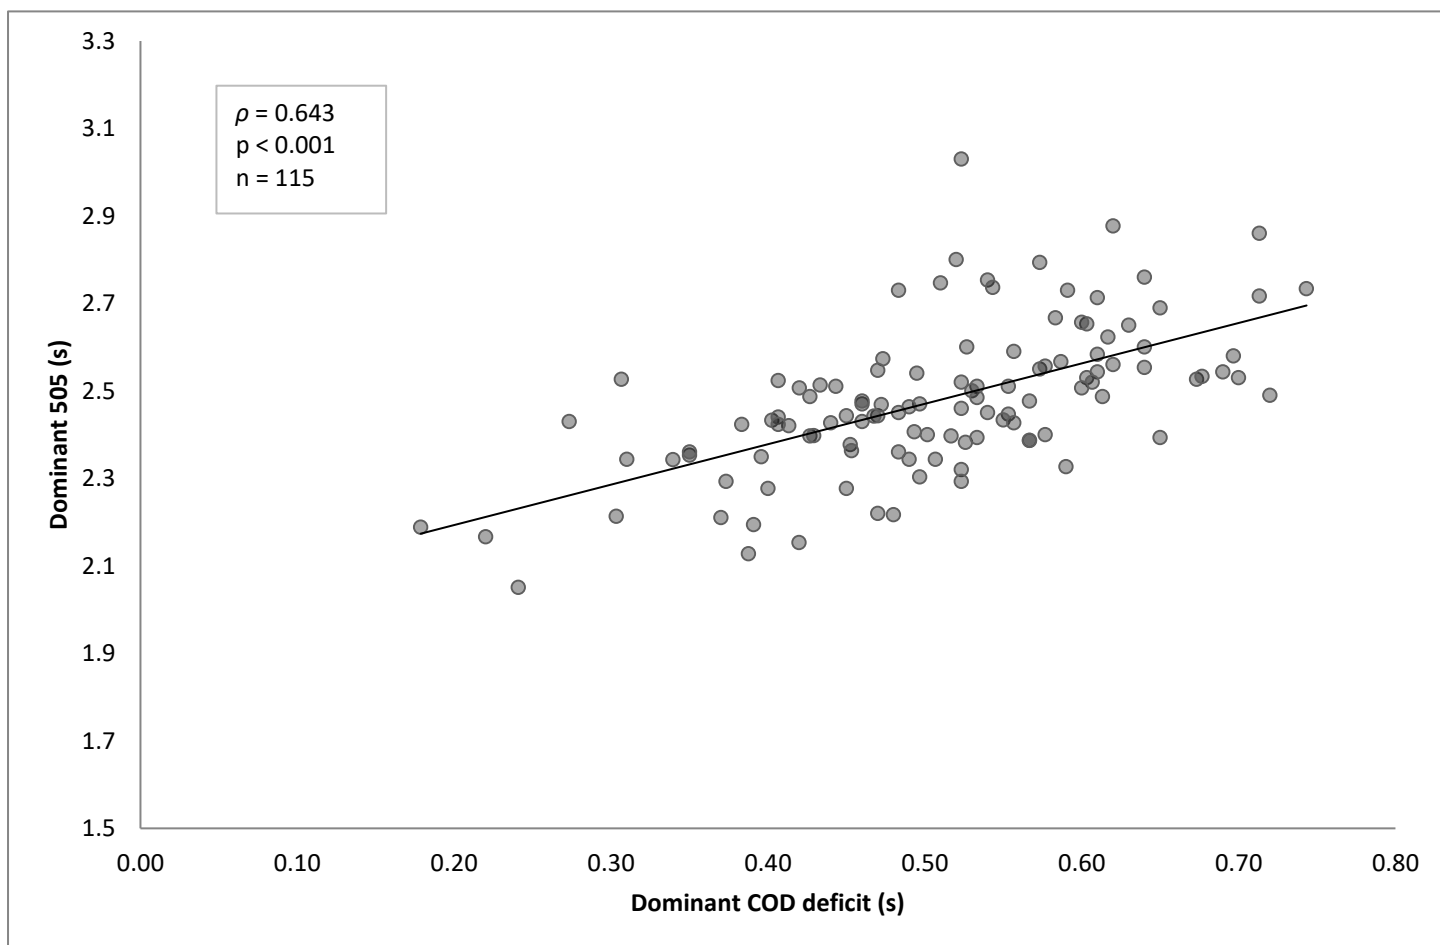

Supplement: s1 [file s1]
